# Supplementary material
Source: Springer Nature journal article supplement (https://www.springermedizin.de/resource/supplementary/12879_2006_491_MOESM2_ESM.pdf/9449052)

1

2

3

4

5

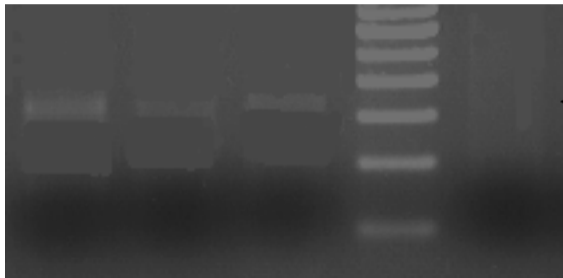

← 360bp

Supplement: MOESM2 [file 9449052]
